# Supplementary material for: Flunixin Meglumine Is Superior to Meloxicam for Providing Analgesia after Surgical Castration in 2-Month-Old Goats
Source: MDPI journal article supplement (doi:10.3390/ani12233437), 2022-12-06
Supplement: s1 [file s1]

**Supplementary Table S1.** Individual responses of goat kids to the von Frey test applied to the scrotum according to the treatments and assessment moment.

| Treatments               | Animals | Von Frey force    |                       |                          |                           |                             |
|--------------------------|---------|-------------------|-----------------------|--------------------------|---------------------------|-----------------------------|
|                          |         | Before castration | Just after castration | One day after castration | Two days after castration | Three days after castration |
|                          |         | M0                | M1                    | M2                       | M3                        | M4                          |
| <b>Meloxicam</b>         | 164     | 446,683           | 3,630                 | 75,858                   | 75,858                    | 446,683                     |
|                          | 160     | 446,683           | 3,630                 | 75,858                   | 2,041                     | 125,892                     |
|                          | 144     | 446,683           | 125,892               | 75,858                   | 8,511                     | 28,840                      |
|                          | 136     | 446,683           | 3,630                 | 3,630                    | 3,630                     | 2,041                       |
|                          | 30      | 446,683           | 281,838               | 0,166                    | 0,166                     | 0,166                       |
|                          | 17      | 28,840            | 28,840                | 0,068                    | 0,068                     | 0,068                       |
|                          | 29      | 28,840            | 0,166                 | 0,068                    | 0,068                     | 0,068                       |
|                          | 30      | 125,892           | 0,166                 | 0,166                    | 0,068                     | 0,068                       |
|                          | 9       | 125,892           | 0,166                 | 0,068                    | 0,068                     | 0,068                       |
| <b>FlunixinMeglumine</b> | 162     | 446,683           | 281,838               | 28,840                   | 0,407                     | 2,041                       |
|                          | 12      | 446,683           | 281,838               | 446,683                  | 0,023                     | 0,166                       |
|                          | 142     | 446,683           | 281,838               | 75,858                   | 0,005                     | 0,407                       |
|                          | 170     | 446,683           | 281,838               | 28,840                   | 0,005                     | 0,407                       |
|                          | 330     | 446,683           | 446,683               | 446,683                  | 28,84                     | 0,407                       |
|                          | 336     | 0,068             | 0,068                 | 0,023                    | 0,005                     | 0,005                       |
|                          | 339     | 446,683           | 446,683               | 446,683                  | 446,683                   | 446,683                     |
|                          | 335     | 125,892           | 446,683               | 446,683                  | 446,683                   | 15,136                      |

**Supplementary Table S2.** Individual responses of goat kids to the von Frey test applied to the Gracilis muscle according to the treatments and assessment moment.

| Treatments               | Animals | Von Frey force          |                             |                                |                                 |                                   |
|--------------------------|---------|-------------------------|-----------------------------|--------------------------------|---------------------------------|-----------------------------------|
|                          |         | Before castration<br>M0 | Just after castration<br>M1 | One day after castration<br>M2 | Two days after castration<br>M3 | Three days after castration<br>M4 |
| <b>Meloxicam</b>         | 164     | 446,683                 | 446,683                     | 446,683                        | 446,683                         | 446,683                           |
|                          | 160     | 446,683                 | 446,683                     | 446,683                        | 446,683                         | 446,683                           |
|                          | 144     | 446,683                 | 446,683                     | 446,683                        | 446,683                         | 446,683                           |
|                          | 136     | 446,683                 | 446,683                     | 446,683                        | 446,683                         | 446,683                           |
|                          | 30      | 446,683                 | 446,683                     | 0,166                          | 11,749                          | 0,166                             |
|                          | 17      | 446,683                 | 28,840                      | 0,068                          | 0,068                           | 0,068                             |
|                          | 29      | 28,840                  | 0,166                       | 0,068                          | 0,068                           | 0,068                             |
|                          | 30      | 125,892                 | 0,166                       | 0,166                          | 0,068                           | 0,068                             |
|                          | 9       | 125,892                 | 0,166                       | 0,068                          | 0,068                           | 0,068                             |
| <b>FlunixinMeglumine</b> | 162     | 446,683                 | 446,683                     | 446,683                        | 446,683                         | 446,683                           |
|                          | 12      | 446,683                 | 446,683                     | 446,683                        | 446,683                         | 446,683                           |
|                          | 142     | 446,683                 | 446,683                     | 446,683                        | 446,683                         | 446,683                           |
|                          | 170     | 446,683                 | 446,683                     | 446,683                        | 446,683                         | 446,683                           |
|                          | 330     | 446,683                 | 446,683                     | 446,683                        | 446,683                         | 446,683                           |
|                          | 336     | 125,892                 | 75,858                      | 0,028                          | 446,683                         | 281,838                           |
|                          | 339     | 446,683                 | 446,683                     | 446,683                        | 446,683                         | 446,683                           |
|                          | 335     | 446,683                 | 446,683                     | 446,683                        | 446,683                         | 446,683                           |

**Supplementary Table S3.** Individual responses of goat kids to the von Frey test applied to the hypogastric region of the abdomen according to the treatments and assessment moment.

| Treatments               | Animals | Von Frey force          |                             |                                |                                 |                                   |
|--------------------------|---------|-------------------------|-----------------------------|--------------------------------|---------------------------------|-----------------------------------|
|                          |         | Before castration<br>M0 | Just after castration<br>M1 | One day after castration<br>M2 | Two days after castration<br>M3 | Three days after castration<br>M4 |
| <b>Meloxicam</b>         | 164     | 446,683                 | 3,630                       | 75,858                         | 446,683                         | 446,683                           |
|                          | 160     | 446,683                 | 281,838                     | 281,838                        | 446,683                         | 3,630                             |
|                          | 144     | 446,683                 | 281,838                     | 75,858                         | 446,683                         | 8,511                             |
|                          | 136     | 446,683                 | 75,858                      | 125,892                        | 446,683                         | 2,041                             |
|                          | 30      | 446,683                 | 0,166                       | 0,166                          | 0,166                           | 0,166                             |
|                          | 17      | 28,840                  | 281,838                     | 0,068                          | 0,068                           | 0,068                             |
|                          | 29      | 28,840                  | 0,166                       | 0,068                          | 0,068                           | 0,068                             |
|                          | 30      | 125,892                 | 0,166                       | 0,166                          | 0,068                           | 0,068                             |
|                          | 9       | 125,892                 | 0,166                       | 0,068                          | 0,068                           | 0,068                             |
| <b>FlunixinMeglumine</b> | 162     | 446,683                 | 446,683                     | 28,840                         | 446,683                         | 5,495                             |
|                          | 12      | 446,683                 | 281,838                     | 446,683                        | 125,892                         | 446,683                           |
|                          | 142     | 446,683                 | 446,683                     | 281,838                        | 75,858                          | 75,858                            |
|                          | 170     | 2,041                   | 446,683                     | 281,838                        | 125,892                         | 125,892                           |
|                          | 330     | 446,683                 | 446,683                     | 446,683                        | 446,683                         | 8,511                             |
|                          | 336     | 0,166                   | 0,068                       | 0,023                          | 0,023                           | 0,023                             |
|                          | 339     | 446,683                 | 446,683                     | 446,683                        | 446,683                         | 446,683                           |
|                          | 335     | 446,683                 | 446,683                     | 446,683                        | 446,683                         | 446,683                           |
